# Supplementary material
Source: PubMed Central journal article supplement (PMC3111092)

## Resorcylic Acid Lactones with Cytotoxic and NF- $\kappa$ B Inhibitory Activities and Their Structure-activity Relationships

Sloan Ayers, Tyler N. Graf, Audrey F. Adcock, David J. Kroll, Susan Matthew, Esperanza J. Carcache de Blanco, Qi Shen, Steven M. Swanson, Mansukh C. Wani, Cedric J. Pearce, and Nicholas H. Oberlies

### Supporting Information

#### Contents:

**Figure S1.** Analytical HPLC of MeOH-CH<sub>3</sub>CN Partition.

**Figure S2.** <sup>1</sup>H NMR of 15-*O*-Desmethyl-5*Z*-7-oxozeaenol (**1**) in DMSO-*d*<sub>6</sub>

**Figure S3.** <sup>13</sup>C NMR of 15-*O*-Desmethyl-5*Z*-7-oxozeaenol (**1**) in DMSO-*d*<sub>6</sub>

**Figure S4.** <sup>1</sup>H NMR of 7-*epi*-Zeaenol (**3**) in DMSO-*d*<sub>6</sub>

**Figure S5.** <sup>13</sup>C NMR of 7-*epi*-Zeaenol (**3**) in DMSO-*d*<sub>6</sub>

**Table S1.** <sup>1</sup>H and <sup>13</sup>C NMR Data for Compounds **4** and **5**

**Figure S6.** <sup>1</sup>H NMR of Known Compounds **2** and **4-6** (500 MHz)

**Figure S1.** Analytical HPLC of MeOH-CH<sub>3</sub>CN Partition. 35-40% MeCN in H<sub>2</sub>O over 20 minutes. Gemini NX C18, 250 x 4.6 mm, 5 μm, 1 mL/min, 235 nm.

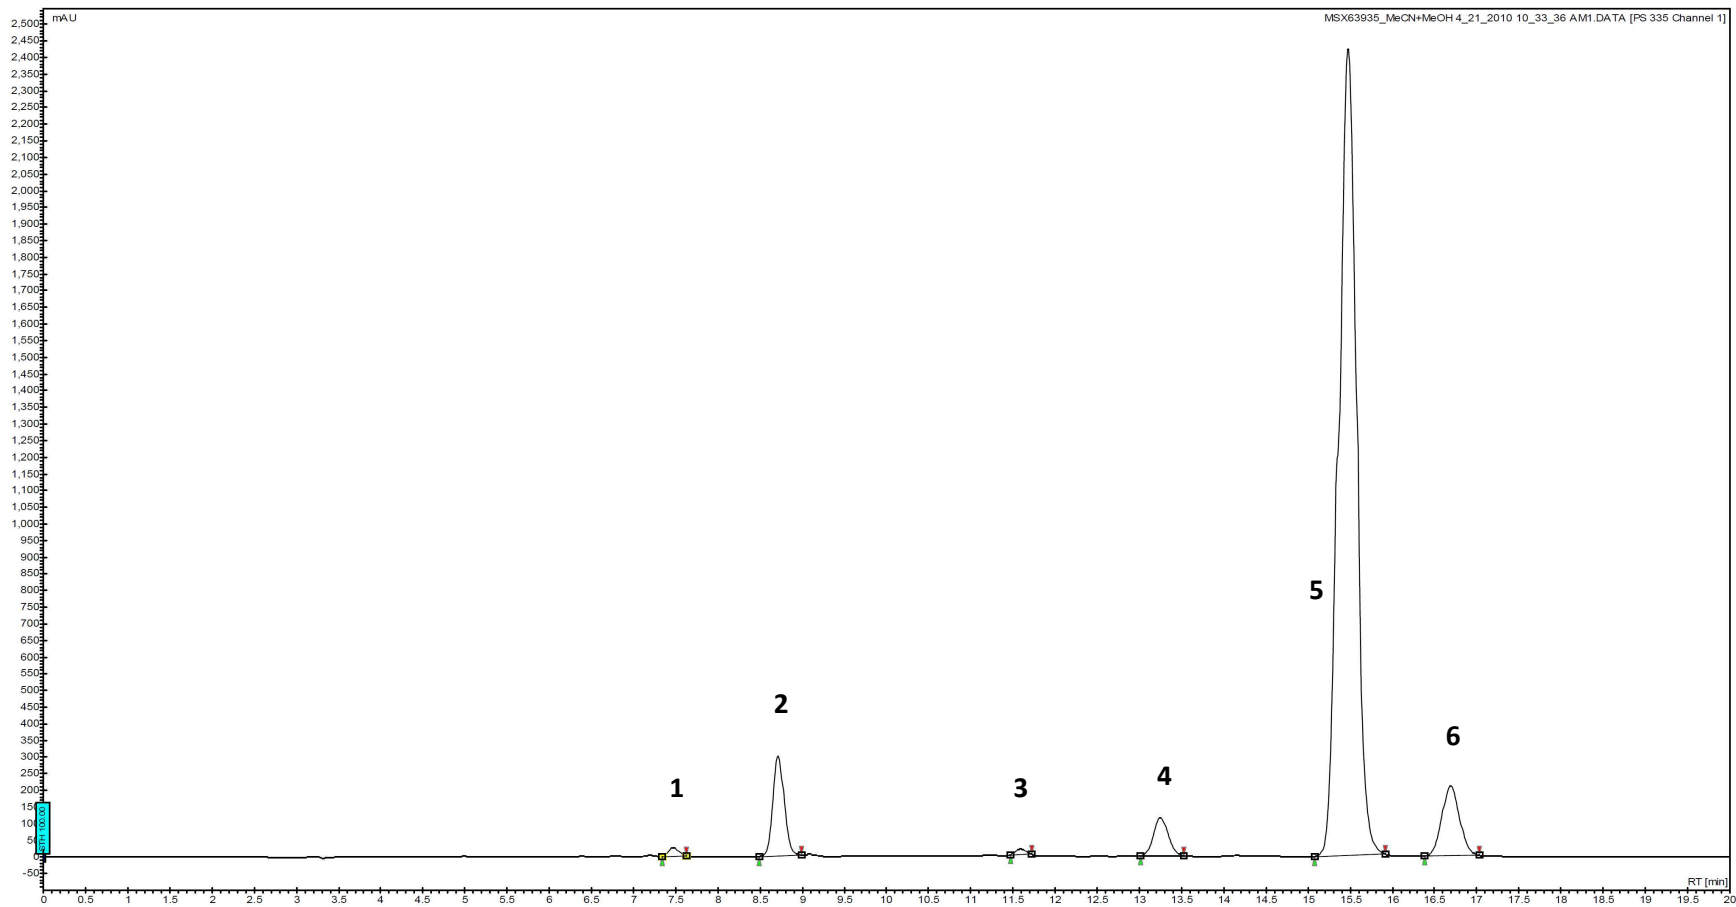

Figure S2.  $^1\text{H}$  NMR of 15-*O*-Desmethyl-5*Z*-7-oxozeaenol (**1**) in  $\text{DMSO-}d_6$

9/7/2010 2:34:06 PM

|                        |                                                                                         |                        |                         |                      |                      |
|------------------------|-----------------------------------------------------------------------------------------|------------------------|-------------------------|----------------------|----------------------|
| Acquisition Time (sec) | 2.2719                                                                                  | Comment                | Sloan Sample 01003-58-1 | Date                 | 23 Jul 2010 15:02:24 |
| Date Stamp             | 23 Jul 2010 15:02:24                                                                    |                        |                         |                      |                      |
| File Name              | C:\Documents and Settings\dscayers\UNCG\Desktop\Sloan\Kannapolis Data\01003-58-1\1H\fid |                        |                         | Frequency (MHz)      | 700.13               |
| Nucleus                | $^1\text{H}$                                                                            | Number of Transients   | 16                      | Origin               | spect                |
| Owner                  | nmsu                                                                                    | Points Count           | 32768                   | Pulse Sequence       | zg30                 |
| SW(cyclical) (Hz)      | 14423.08                                                                                | Solvent                | DMSO- $d_6$             | Spectrum Offset (Hz) | 4323.5869            |
| Sweep Width (Hz)       | 14422.64                                                                                | Temperature (degree C) | 25.160                  | Spectrum Type        | STANDARD             |

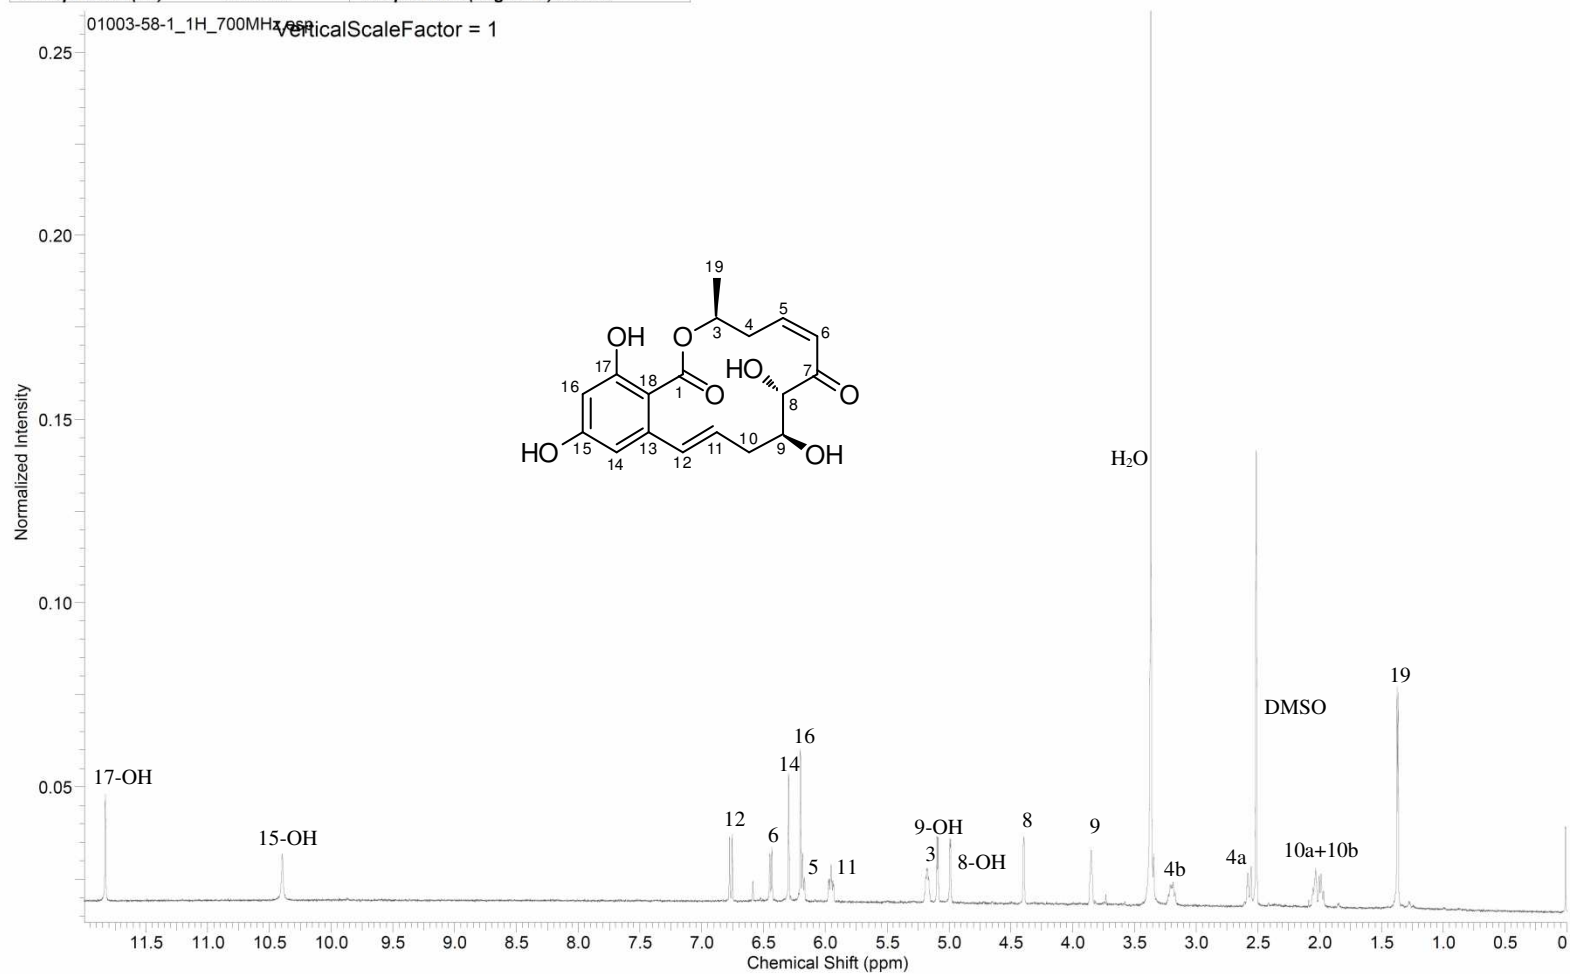

Figure S3. <sup>13</sup>C NMR of 15-*O*-Desmethyl-5*Z*-7-oxozeaenol (**1**) in DMSO-*d*<sub>6</sub>

9/7/2010 2:48:38 PM

|                        |                                                                                         |                        |                             |                      |                      |
|------------------------|-----------------------------------------------------------------------------------------|------------------------|-----------------------------|----------------------|----------------------|
| Acquisition Time (sec) | 0.7864                                                                                  | Comment                | Sloan Sample 01003-58-1     | Date                 | 23 Jul 2010 18:22:56 |
| Date Stamp             | 23 Jul 2010 18:22:56                                                                    |                        |                             |                      |                      |
| File Name              | C:\Documents and Settings\dsayers.UNCG\Desktop\Sloan\Kannapolis Data\01003-58-1\13C\fid |                        |                             | Frequency (MHz)      | 176.05               |
| Nucleus                | 13C                                                                                     | Number of Transients   | 4096                        | Origin               | spect                |
| Owner                  | nmrsu                                                                                   | Points Count           | 32768                       | Pulse Sequence       | zgpg30               |
| SW(cyclical) (Hz)      | 41666.67                                                                                | Solvent                | DMSO- <i>d</i> <sub>6</sub> | Spectrum Offset (Hz) | 17498.6523           |
| Sweep Width (Hz)       | 41665.39                                                                                | Temperature (degree C) | 25.160                      | Spectrum Type        | STANDARD             |

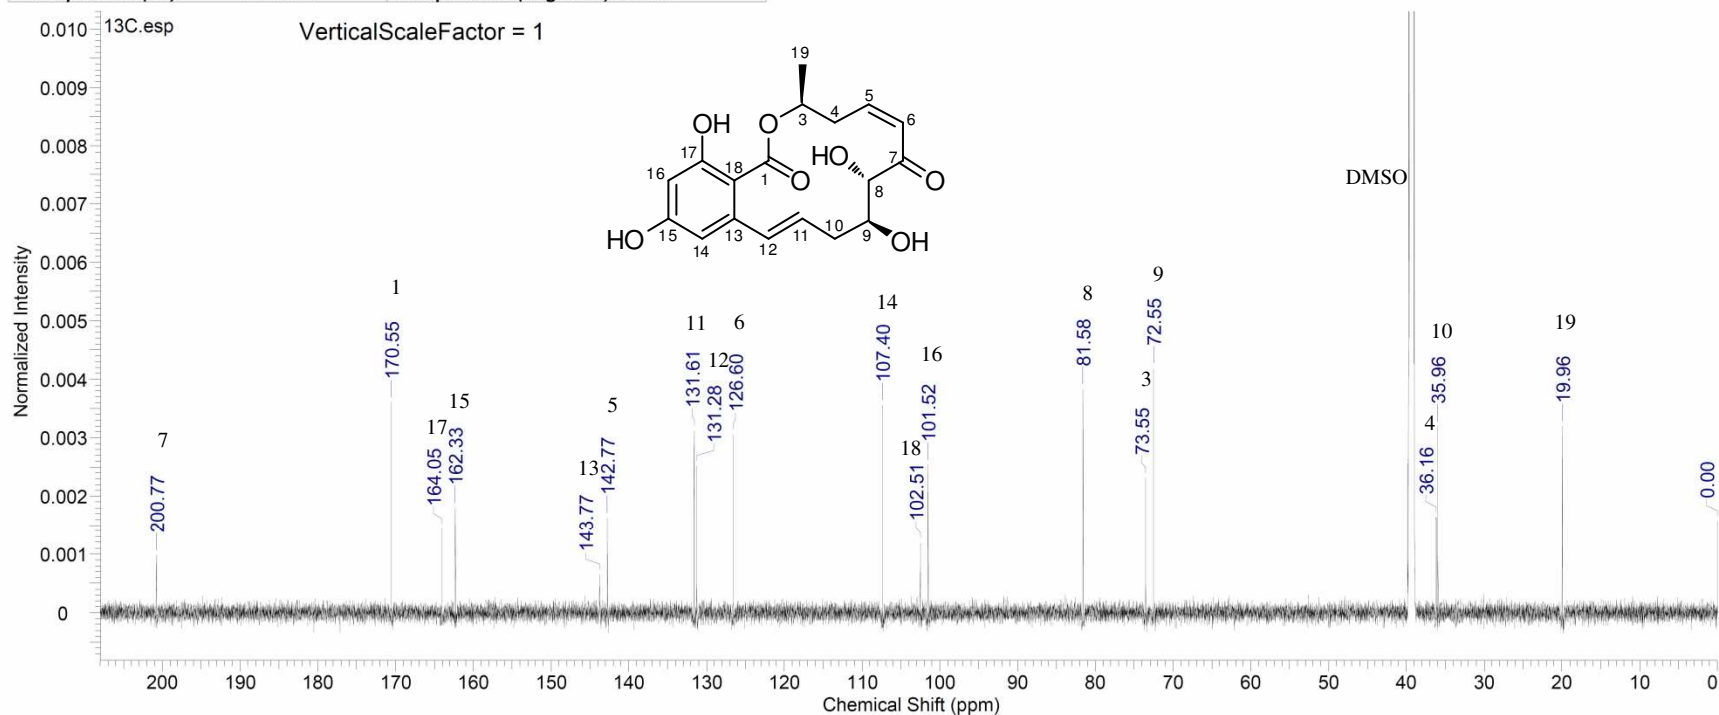

| No. | (ppm) | (Hz)    | Height | No. | (ppm)  | (Hz)    | Height | No. | (ppm)  | (Hz)    | Height | No. | (ppm)  | (Hz)    | Height |
|-----|-------|---------|--------|-----|--------|---------|--------|-----|--------|---------|--------|-----|--------|---------|--------|
| 1   | 0.00  | 0.0     | 0.0016 | 6   | 73.55  | 12948.4 | 0.0023 | 11  | 126.60 | 22288.0 | 0.0030 | 16  | 162.33 | 28578.4 | 0.0018 |
| 2   | 19.96 | 3513.3  | 0.0032 | 7   | 81.58  | 14362.3 | 0.0038 | 12  | 131.28 | 23110.7 | 0.0025 | 17  | 164.05 | 28879.8 | 0.0014 |
| 3   | 35.96 | 6329.9  | 0.0032 | 8   | 101.52 | 17871.9 | 0.0025 | 13  | 131.61 | 23170.5 | 0.0031 | 18  | 170.55 | 30024.2 | 0.0036 |
| 4   | 36.16 | 6365.5  | 0.0016 | 9   | 102.51 | 18047.3 | 0.0012 | 14  | 142.77 | 25135.0 | 0.0016 | 19  | 200.77 | 35345.7 | 0.0010 |
| 5   | 72.55 | 12771.6 | 0.0042 | 10  | 107.40 | 18908.2 | 0.0036 | 15  | 143.77 | 25310.5 | 0.0006 |     |        |         |        |

Figure S4. <sup>1</sup>H NMR of 7-*epi*-Zeaenol (3) in DMSO-*d*<sub>6</sub>

9/7/2010 3:03:31 PM

|                        |                                                                                        |                        |                             |                      |                      |
|------------------------|----------------------------------------------------------------------------------------|------------------------|-----------------------------|----------------------|----------------------|
| Acquisition Time (sec) | 2.2719                                                                                 | Comment                | Sloan Sample 01003-58-2     | Date                 | 26 Jul 2010 07:53:36 |
| Date Stamp             | 26 Jul 2010 07:53:36                                                                   |                        |                             |                      |                      |
| File Name              | C:\Documents and Settings\dsayers.UNCG\Desktop\Sloan\Kannapolis Data\01003-58-2\1H\fid |                        |                             | Frequency (MHz)      | 700.13               |
| Nucleus                | 1H                                                                                     | Number of Transients   | 16                          | Origin               | spect                |
| Owner                  | nmsu                                                                                   | Points Count           | 32768                       | Pulse Sequence       | zg30                 |
| SW(cyclical) (Hz)      | 14423.08                                                                               | Solvent                | DMSO- <i>d</i> <sub>6</sub> | Spectrum Offset (Hz) | 4316.4033            |
| Sweep Width (Hz)       | 14422.64                                                                               | Temperature (degree C) | 25.160                      | Spectrum Type        | STANDARD             |

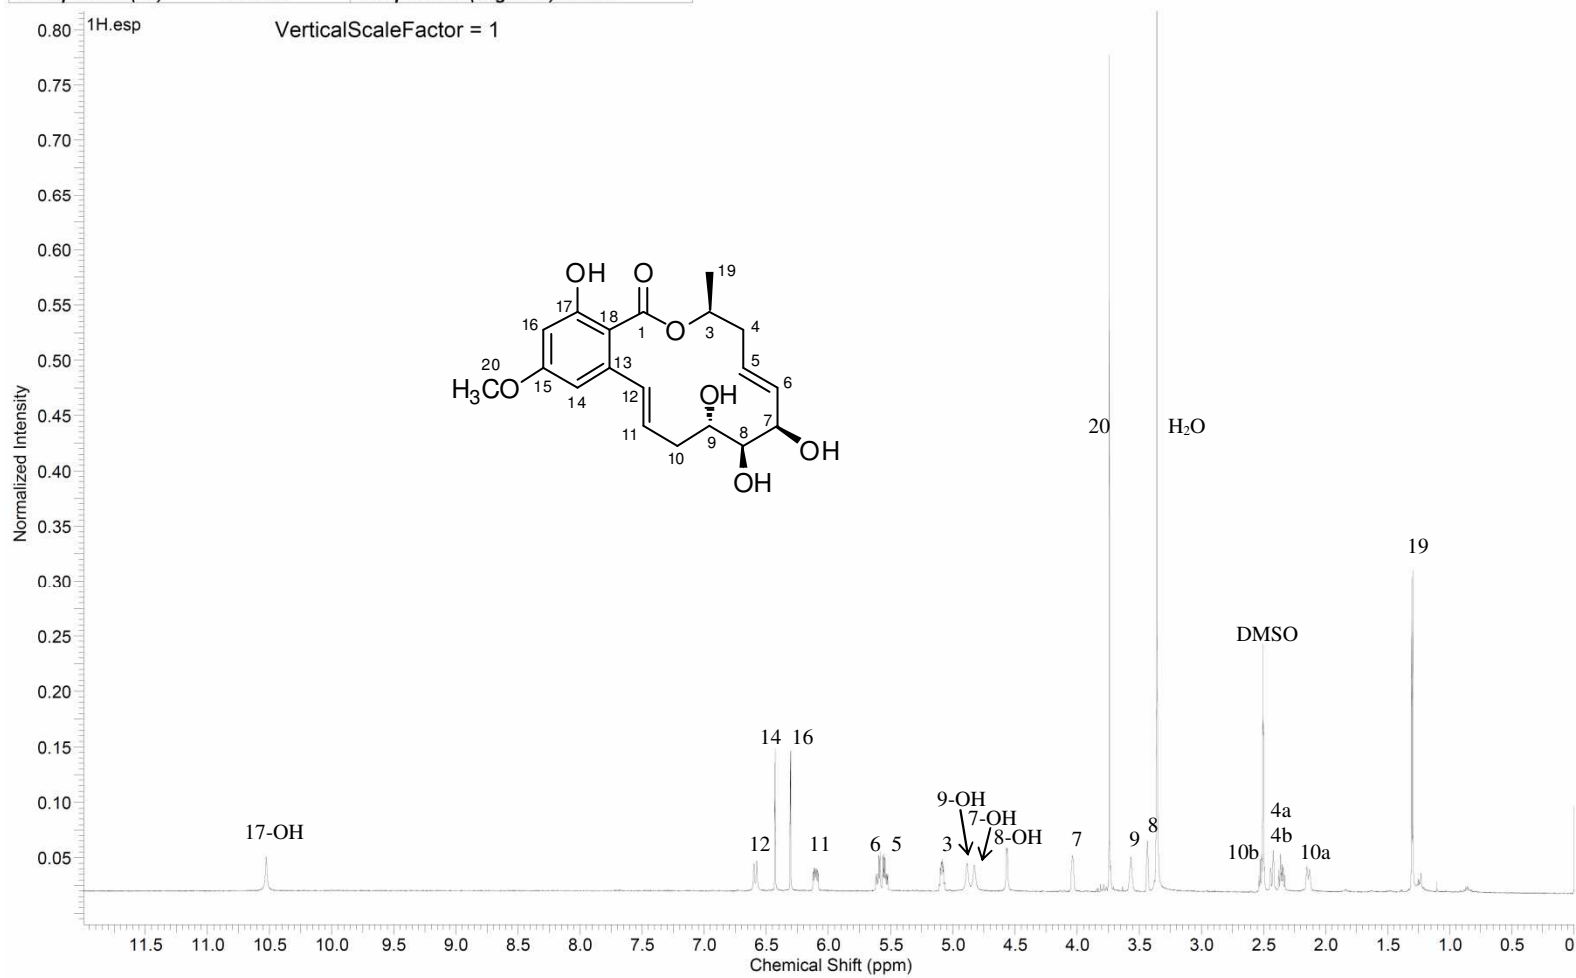

Figure S5.  $^{13}\text{C}$  NMR of 7-*epi*-Zeaenol (**3**) in  $\text{DMSO-}d_6$

9/7/2010 3:21:07 PM

|                        |                                                                                         |                        |                         |                      |                      |
|------------------------|-----------------------------------------------------------------------------------------|------------------------|-------------------------|----------------------|----------------------|
| Acquisition Time (sec) | 0.7864                                                                                  | Comment                | Sloan Sample 01003-58-2 | Date                 | 26 Jul 2010 11:07:44 |
| Date Stamp             | 26 Jul 2010 11:07:44                                                                    |                        |                         |                      |                      |
| File Name              | C:\Documents and Settings\dsayers.UNCG\Desktop\Sloan\Kannapolis Data\01003-58-2\13C\fid |                        |                         | Frequency (MHz)      | 176.05               |
| Nucleus                | 13C                                                                                     | Number of Transients   | 4096                    | Origin               | spect                |
| Owner                  | nmsu                                                                                    | Points Count           | 32768                   | Pulse Sequence       | zgpg30               |
| SW(cyclical) (Hz)      | 41666.67                                                                                | Solvent                | DMSO-d6                 | Spectrum Offset (Hz) | 17526.8105           |
| Sweep Width (Hz)       | 41665.39                                                                                | Temperature (degree C) | 25.160                  | Spectrum Type        | STANDARD             |

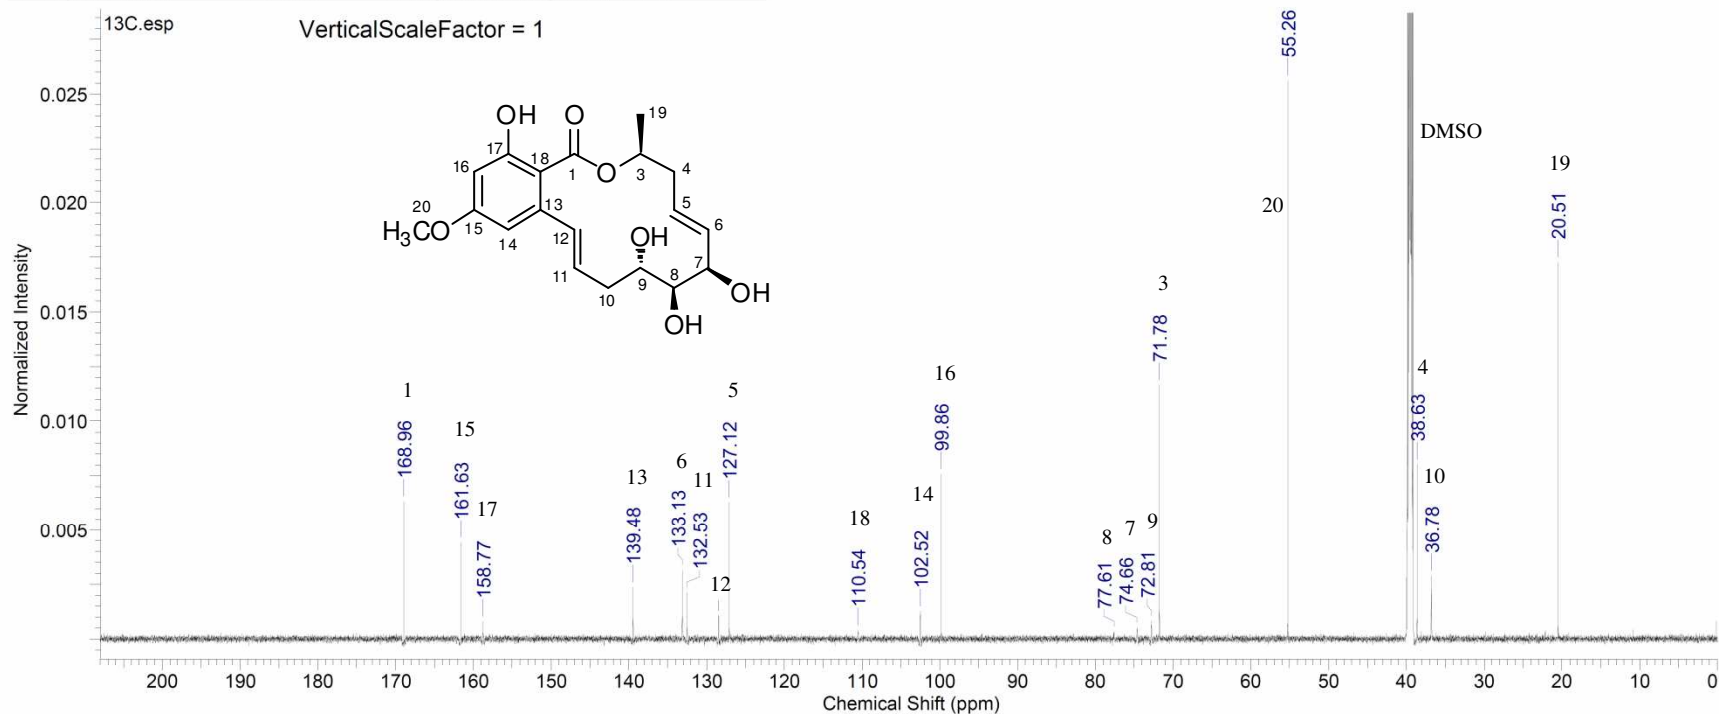

| No. | (ppm) | (Hz)    | Height | No. | (ppm)  | (Hz)    | Height | No. | (ppm)  | (Hz)    | Height | No. | (ppm)  | (Hz)    | Height |
|-----|-------|---------|--------|-----|--------|---------|--------|-----|--------|---------|--------|-----|--------|---------|--------|
| 1   | 20.51 | 3610.2  | 0.0173 | 6   | 72.81  | 12817.6 | 0.0008 | 11  | 110.54 | 19460.2 | 0.0004 | 16  | 139.48 | 24555.4 | 0.0024 |
| 2   | 36.78 | 6475.0  | 0.0029 | 7   | 74.66  | 13143.1 | 0.0005 | 12  | 127.12 | 22378.5 | 0.0063 | 17  | 158.77 | 27951.7 | 0.0008 |
| 3   | 38.63 | 6800.5  | 0.0080 | 8   | 77.61  | 13663.2 | 0.0003 | 13  | 128.47 | 22617.5 | 0.0011 | 18  | 161.63 | 28455.3 | 0.0044 |
| 4   | 55.26 | 9727.7  | 0.0256 | 9   | 99.86  | 17579.6 | 0.0076 | 14  | 132.53 | 23332.1 | 0.0021 | 19  | 168.96 | 29745.9 | 0.0063 |
| 5   | 71.78 | 12637.0 | 0.0117 | 10  | 102.52 | 18048.8 | 0.0013 | 15  | 133.13 | 23437.7 | 0.0031 |     |        |         |        |

**Table S1.** NMR Data for Known Compounds **4** and **5** (500 MHz, chemical shifts in  $\delta$ , coupling constants in Hz, DMSO- $d_6$  for **4**, CDCl $_3$  for **5**)

| Position | 5E-7-Oxozeaenol ( <b>4</b> ) |                               | 5Z-7-Oxozeaenol ( <b>5</b> ) |                               |
|----------|------------------------------|-------------------------------|------------------------------|-------------------------------|
|          | $\delta_C$                   | $\delta_H$ (mult.; $J$ in Hz) | $\delta_C$                   | $\delta_H$ (mult.; $J$ in Hz) |
| 1        | 168.2                        | ---                           | 171.5                        | ---                           |
| 3        | 70.2                         | 5.13, qdd (6.0, 8.7, 2.8)     | 73.9                         | 5.24, qdd (6.2, 11.4, 2.4)    |
| 4a       | 37.8                         | 2.44, ddd (14.4, 8.7, 8.7)    | 37.2                         | 2.50, dd (17.2, 2.4)          |
| 4b       | 37.8                         | 2.59, ddd (14.4, 6.2, 2.8)    | 37.2                         | 3.57, dd (17.2, 11.4)         |
| 5        | 142.3                        | 6.82, ddd (15.7, 8.7, 6.2)    | 147.7                        | 6.21, ddd (11.7, 11.0, 2.7)   |
| 6        | 130.3                        | 6.49, d (15.7)                | 125.4                        | 6.33, dd (11.7, 2.7)          |
| 7        | 200.7                        | ---                           | 199.3                        | ---                           |
| 8        | 78.2                         | 4.32, dd (5.1, 4.0)           | 81.0                         | 4.51, d (2.1)                 |
| 9        | 71.9                         | 4.02, m                       | 73.8                         | 3.99, ddd (5.5, 2.7, 2.1)     |
| 10a      | 36.0                         | 2.14, ddd (15.3, 6.5, 2.9)    | 37.7                         | 2.12, ddd (15.8, 11.0, 2.7)   |
| 10b      | 36.0                         | 2.36, ddd (15.3, 6.5, 6.5)    | 37.7                         | 2.21, ddd (15.8, 5.5, 2.1)    |
| 11       | 130.5                        | 6.17, ddd (15.7, 6.5, 6.5)    | 130.4                        | 5.98, ddd (15.1, 11.0, 4.1)   |
| 12       | 128.6                        | 6.27, d (15.7)                | 133.1                        | 6.87, d (15.1)                |
| 13       | 138.4                        | ---                           | 143.3                        | ---                           |
| 14       | 102.6                        | 6.45, d (2.3)                 | 108.4                        | 6.40, d (2.7)                 |
| 15       | 161.3                        | ---                           | 164.4                        | ---                           |
| 16       | 100.1                        | 6.32, d (2.3)                 | 100.4                        | 6.39, d (2.7)                 |
| 17       | 157.9                        | ---                           | 166.1                        | ---                           |
| 18       | 111.5                        | ---                           | 103.6                        | ---                           |
| 19       | 20.1                         | 1.35, d (6.0)                 | 20.9                         | 1.47, d (6.2)                 |
| 20       | 55.2                         | 3.74, s                       | 55.6                         | 3.80, s                       |
| 7-OH     | ---                          | ---                           | ---                          | ---                           |
| 8-OH     | ---                          | 5.17, d (5.1)                 | ---                          | ---                           |
| 9-OH     | ---                          | 4.99, d (5.7)                 | ---                          | ---                           |
| 15-OH    | ---                          | ---                           | ---                          | ---                           |
| 17-OH    | ---                          | 10.34, s                      | ---                          | 12.14, s                      |

**Figure S6.**  $^1\text{H}$  NMR of Known Compounds **2** and **4-6** (**2** and **4** in  $\text{DMSO-}d_6$ , **5** and **6** in  $\text{CDCl}_3$ , 500 MHz)

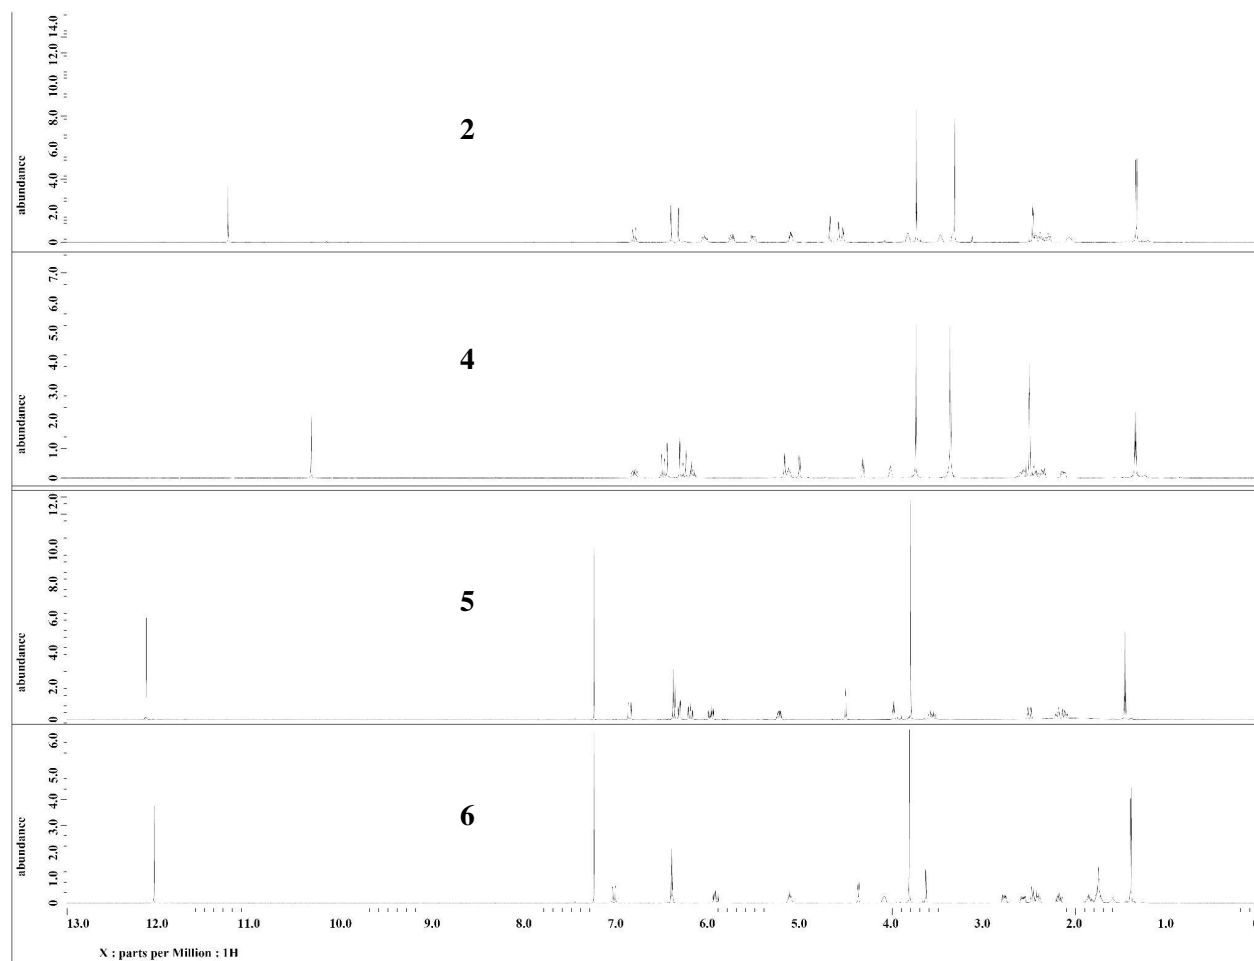

Supplement: NIHMS291519-supplement-1_si_001.pdf [file NIHMS291519-supplement-1_si_001.pdf]
